# Supplementary material
Source: PubMed Central journal article supplement (PMC5848282)
Supplement: eye2017242x1.pdf [file eye2017242x1.pdf]

Supplementary table . List of mutations for each patient and visual acuity.

| Patient | Age | Mutation                        | Type of mutation | BCVA (LogMAR) |          |
|---------|-----|---------------------------------|------------------|---------------|----------|
|         |     |                                 |                  | Right eye     | Left eye |
| 1       | 54  | c.877C>T; p.R293X               | Nonsense         | 3.00          | 3.00     |
| 2       | 29  | c.1245_1246delins14; p.K415NfsX | Deletion         | 0.00          | 0.00     |
| 3       | 12  | c.1584_1587delTGTT; p.P529Hfs   | Deletion         | 0.08          | 3.00     |
| 4       | 30  | c.116+1G>A (intron 2)           | Splice site      | 0.08          | 0.08     |
| 5       | 33  | c.759delA; p.R253Rfs            | Deletion         | 0.17          | 0.30     |
| 6       | 32  | Deletion of exons12-13          | Deletion         | 0.17          | 0.17     |
| 7       | 36  | c.116+1G>A (intron 2)           | Splice site      | 0.08          | 0.00     |
| 8       | 20  | Deletion of exon 3              | Deletion         | 0.30          | 0.17     |
| 9       | 57  | c.1347C>G; p.Y449X              | Nonsense         | N/A           | 0.47     |

BCVA: Best corrected visual acuity, N/A not available
